# Supplementary material
Source: MDPI journal article supplement (https://www.mdpi.com/2304-6775/11/4/48)
Supplement: s1 [file s1]

**Supplementary Table S1.** Scholarly Output by Middle Eastern and Arab Countries.

| Country              | Number of total<br>scholarly outputs | Adjusted number of<br>scholarly outputs* |
|----------------------|--------------------------------------|------------------------------------------|
| Iran                 | 804289                               | 160925                                   |
| Egypt                | 327649                               | 108923                                   |
| Turkey               | 783062                               | 74231                                    |
| Tunisia              | 119010                               | 28636                                    |
| Morocco              | 99321                                | 27614                                    |
| Algeria              | 101631                               | 22155                                    |
| Iraq                 | 100229                               | 16728                                    |
| Jordan               | 66652                                | 15088                                    |
| Saudi Arabia         | 345802                               | 13842                                    |
| Israel               | 404976                               | 11529                                    |
| Sudan                | 14446                                | 11501                                    |
| Yemen                | 9545                                 | 8913                                     |
| Palestine            | 12603                                | 8841                                     |
| Syrian Arab Republic | 10395                                | 8457                                     |
| Lebanon              | 47639                                | 6488                                     |
| United Arab Emirates | 101341                               | 2011                                     |
| Oman                 | 31012                                | 1446                                     |
| Cyprus               | 42677                                | 1330                                     |
| Libya                | 8853                                 | 872                                      |
| Kuwait               | 31660                                | 870                                      |

|            |       |     |
|------------|-------|-----|
| Qatar      | 48886 | 652 |
| Mauritania | 957   | 534 |
| Bahrain    | 11699 | 420 |
| Djibouti   | 406   | 195 |
| Comoros    | 219   | 139 |

*Note. Publication activity was adjusted for population size and gross domestic product (GDP) retrieved from the online databases of the World Bank. An adjustment index (AI) was calculated using the following formula:  $AI = [\text{total number of scholarly outputs for the country} / \text{GDP per capita of the country}] * 1,000$ . Where  $\text{GDP per capita} = \text{GDP} / \text{population of the country}$ .*

**Supplementary Table S2.** Percentage of scholarly outputs in Scopus Q1, Q2, Q3, Q4, and top 10% journals by country and by region.

| Country  | Scholarly Output | Q1     | Q2     | Q3     | Q4     | Top 10% |
|----------|------------------|--------|--------|--------|--------|---------|
| Algeria  | 101631           | 23.43% | 22.57% | 20.59% | 12.51% | 7.63%   |
| Bahrain  | 11699            | 26.32% | 21.57% | 14.83% | 15.93% | 9.34%   |
| Comoros  | 219              | 38.36% | 21.46% | 16.44% | 14.16% | 7.76%   |
| Cyprus   | 42677            | 41.48% | 20.51% | 11.37% | 6.19%  | 14.84%  |
| Djibouti | 406              | 44.09% | 18.97% | 13.30% | 4.68%  | 10.84%  |
| Egypt    | 327649           | 33.84% | 24.76% | 16.86% | 10.61% | 13.82%  |
| Iran     | 804289           | 32.45% | 24.81% | 18.95% | 10.27% | 12.12%  |
| Iraq     | 100229           | 16.07% | 15.72% | 20.75% | 27.76% | 8.68%   |
| Israel   | 404976           | 53.82% | 18.93% | 8.04%  | 3.60%  | 15.16%  |
| Jordan   | 66652            | 29.24% | 24.28% | 18.35% | 11.76% | 10.60%  |
| Kuwait   | 31660            | 33.87% | 21.54% | 15.95% | 8.06%  | 10.70%  |
| Lebanon  | 47639            | 39.31% | 22.23% | 13.11% | 6.57%  | 11.81%  |

|                                   |          |        |        |        |        |        |
|-----------------------------------|----------|--------|--------|--------|--------|--------|
| Libya                             | 8853     | 23.29% | 19.00% | 16.58% | 11.53% | 10.39% |
| Mauritania                        | 957      | 36.57% | 20.69% | 21.94% | 8.88%  | 7.63%  |
| Morocco                           | 99321    | 22.88% | 20.23% | 22.71% | 15.11% | 8.83%  |
| Oman                              | 31012    | 32.18% | 22.43% | 16.44% | 9.86%  | 12.72% |
| Palestine                         | 12603    | 34.23% | 25.47% | 16.79% | 7.98%  | 13.91% |
| Qatar                             | 48886    | 45.73% | 19.82% | 10.34% | 5.00%  | 19.41% |
| Saudi Arabia                      | 345802   | 41.00% | 24.55% | 15.43% | 6.46%  | 18.82% |
| Somalia                           | 771      | 33.33% | 21.01% | 27.37% | 7.39%  | 7.52%  |
| Sudan                             | 14446    | 30.96% | 22.46% | 19.24% | 8.97%  | 10.26% |
| Syrian Arab Republic              | 10395    | 28.80% | 22.11% | 23.43% | 12.46% | 8.74%  |
| Tunisia                           | 119010   | 27.82% | 23.43% | 18.25% | 10.34% | 8.19%  |
| Turkey                            | 783062   | 28.42% | 24.81% | 20.71% | 12.73% | 8.77%  |
| United Arab Emirates              | 101341   | 37.76% | 19.26% | 11.79% | 6.27%  | 14.76% |
| Yemen                             | 9545     | 35.74% | 25.66% | 17.46% | 9.35%  | 16.51% |
| Middle Eastern and Arab Countries | 3303079  | 40%    | 27.1%  | 20.6%  | 12.4%  | 18.4%  |
| European Union                    | 13799739 | 52.9%  | 21.6%  | 14.8%  | 10.7%  | 28.3%  |
| North America                     | 14791083 | 61.7%  | 21.1%  | 11.3%  | 5.8%   | 28.3%  |

**Supplementary Table S3.** The most prevalent research subject areas in the total scholarly output produced by Middle Eastern and Arab countries based on Scopus All Science Journal Classification (ASJC).

| Country      | Agricultural<br>& Biological<br>Sciences |      | Chemistry |      | Computer<br>Science |      | Earth &<br>Planetary<br>Sciences |      | Environmental<br>Sciences |      | Mathematics |      | Physics & Astronomy |      |
|--------------|------------------------------------------|------|-----------|------|---------------------|------|----------------------------------|------|---------------------------|------|-------------|------|---------------------|------|
|              | n                                        | FWC  | n         | FWC  | n                   | FWC  | n                                | FWC  | n                         | FWC  | n           | FWC  | n                   | FWC  |
| Algeria      | 7931                                     | 0.7  | 11033     | 0.9  | 23332               | 0.9  | 4892                             | 0.91 | 8593                      | 0.84 | 17023       | 0.93 | 20191               | 0.92 |
| Bahrain      | 462                                      | 0.95 | 511       | 1.23 | 2472                | 0.84 | 281                              | 0.97 | 774                       | 1.23 | 1107        | 0.76 | 1040                | 1.2  |
| Comoros      | 57                                       | 0.83 | 14        | 1.24 | 9                   | 1.29 | 19                               | 0.68 | 36                        | 0.89 | 6           | 1.08 | 6                   | 0.72 |
| Cyprus       | 2236                                     | 1.49 | 2024      | 1.09 | 8333                | 1.31 | 1645                             | 1.26 | 3024                      | 1.7  | 4382        | 1.23 | 4970                | 1.93 |
| Djibouti     | 69                                       | 1.58 | 32        | 0.45 | 15                  | 0.84 | 45                               | 0.82 | 45                        | 0.76 | 10          | 0.77 | 18                  | 0.57 |
| Egypt        | 33501                                    | 1.29 | 47729     | 1.34 | 35516               | 1.49 | 13778                            | 1.08 | 25287                     | 1.4  | 23048       | 1.7  | 39668               | 1.61 |
| Iran         | 72411                                    | 1.08 | 106449    | 1.21 | 86950               | 1.28 | 34815                            | 1.02 | 58362                     | 1.37 | 71457       | 1.21 | 101766              | 1.28 |
| Iraq         | 10517                                    | 0.56 | 10201     | 0.91 | 18450               | 1.06 | 6530                             | 0.87 | 9999                      | 0.9  | 8926        | 1.29 | 15763               | 1.37 |
| Israel       | 25103                                    | 1.37 | 26124     | 1.21 | 50296               | 1.27 | 15133                            | 1.43 | 13785                     | 1.29 | 42242       | 0.98 | 57155               | 1.37 |
| Jordan       | 4512                                     | 1    | 4495      | 1.05 | 13544               | 1.82 | 1928                             | 0.95 | 4377                      | 1.03 | 7210        | 1.79 | 5583                | 1.6  |
| Kuwait       | 1493                                     | 1.26 | 2265      | 1.18 | 4243                | 1.07 | 2648                             | 0.9  | 2350                      | 1.18 | 2938        | 1.16 | 2550                | 1.54 |
| Lebanon      | 2325                                     | 1.12 | 2316      | 1.28 | 6996                | 1.21 | 1229                             | 1.28 | 2643                      | 1.36 | 3262        | 1.12 | 3174                | 1.33 |
| Libya        | 796                                      | 0.87 | 884       | 0.91 | 1670                | 0.94 | 597                              | 1.25 | 728                       | 1.07 | 840         | 0.98 | 706                 | 1.04 |
| Mauritania   | 193                                      | 0.79 | 92        | 0.3  | 62                  | 0.82 | 100                              | 0.67 | 145                       | 0.87 | 97          | 0.56 | 65                  | 0.57 |
| Morocco      | 7480                                     | 1.15 | 9909      | 1.21 | 21795               | 0.95 | 5108                             | 1.39 | 8835                      | 1.22 | 15214       | 0.88 | 13338               | 1.38 |
| Oman         | 2852                                     | 1.44 | 2273      | 1.46 | 4374                | 1.29 | 2343                             | 1.05 | 2793                      | 1.66 | 2524        | 1.36 | 2548                | 1.63 |
| Palestine    | 703                                      | 1.05 | 1312      | 1.28 | 1951                | 1.59 | 336                              | 0.93 | 1163                      | 1.11 | 996         | 1.5  | 1843                | 1.94 |
| Qatar        | 1464                                     | 1.46 | 3603      | 1.6  | 9737                | 2.13 | 1439                             | 1.33 | 2997                      | 1.61 | 3513        | 2.05 | 4637                | 1.72 |
| Saudi Arabia | 24127                                    | 1.74 | 50883     | 1.73 | 54154               | 1.65 | 14517                            | 1.45 | 24129                     | 1.81 | 39474       | 1.85 | 47965               | 1.88 |

|                      |           |      |       |      |       |      |       |      |       |      |       |      |       |      |
|----------------------|-----------|------|-------|------|-------|------|-------|------|-------|------|-------|------|-------|------|
| Somalia              | 59        | 1.03 | 4     | 1.94 | 57    | 0.92 | 17    | 0.69 | 49    | 1.4  | 11    | 1.17 | 8     | 1.33 |
| Sudan                | 2702      | 1.06 | 1188  | 1.03 | 1569  | 1.03 | 559   | 1    | 985   | 1.01 | 849   | 1.06 | 1132  | 1.16 |
| Syria                | 2205      | 0.58 | 785   | 0.85 | 795   | 1.62 | 530   | 0.79 | 1058  | 0.8  | 408   | 1.69 | 988   | 1    |
| Tunisia              | 1177<br>2 | 1.07 | 10962 | 1    | 26976 | 0.89 | 3672  | 0.86 | 8861  | 1.06 | 15693 | 0.84 | 14405 | 0.96 |
| Turkey               | 6345<br>2 | 0.9  | 60349 | 1.11 | 73556 | 1.22 | 25641 | 0.96 | 45020 | 1.35 | 53139 | 1.48 | 75907 | 1.3  |
| United Arab Emirates | 3956      | 1.43 | 5990  | 1.55 | 22801 | 1.73 | 6733  | 1.14 | 7246  | 1.75 | 8933  | 1.73 | 9139  | 1.57 |
| Yemen                | 791       | 1.45 | 1200  | 1.48 | 1656  | 1.83 | 489   | 0.95 | 692   | 1.11 | 1313  | 2.37 | 1330  | 1.78 |

---

| Country    | Chemical Engineering |      | Energy |      | Engineering |      | Materials Science |      |
|------------|----------------------|------|--------|------|-------------|------|-------------------|------|
|            | n                    | FWC  | n      | FWC  | n           | FWC  | n                 | FWC  |
| Algeria    | 6243                 | 0.99 | 8599   | 0.94 | 36163       | 0.95 | 17322             | 0.89 |
| Bahrain    | 352                  | 0.9  | 667    | 1.14 | 2325        | 0.85 | 978               | 1.13 |
| Comoros    | 6                    | 1.84 | 5      | 1.59 | 17          | 1.31 | 3                 | 1.8  |
| Cyprus     | 1315                 | 1.3  | 1856   | 1.46 | 8318        | 1.4  | 2465              | 1.12 |
| Djibouti   | 15                   | 1.47 | 20     | 1.4  | 36          | 0.72 | 22                | 0.57 |
| Egypt      | 19756                | 1.53 | 17116  | 1.49 | 68656       | 1.49 | 44543             | 1.41 |
| Iran       | 60298                | 1.26 | 44510  | 1.51 | 197062      | 1.3  | 102965            | 1.25 |
| Iraq       | 5553                 | 1.19 | 5042   | 1.42 | 28033       | 1.08 | 13485             | 1.29 |
| Israel     | 12385                | 1.13 | 5003   | 1.34 | 49796       | 1.15 | 29957             | 1.1  |
| Jordan     | 2538                 | 1.2  | 2784   | 1.24 | 14301       | 1.51 | 5046              | 1.3  |
| Kuwait     | 2020                 | 1.53 | 3000   | 1.17 | 6413        | 1.26 | 2479              | 1.24 |
| Lebanon    | 1259                 | 1.4  | 1765   | 1.42 | 8793        | 1.22 | 2481              | 1.22 |
| Libya      | 517                  | 1    | 732    | 1.03 | 2199        | 1.03 | 867               | 1.06 |
| Mauritania | 24                   | 0.48 | 44     | 0.68 | 101         | 0.85 | 79                | 0.49 |
| Morocco    | 3929                 | 1.13 | 5794   | 1.31 | 22870       | 1.02 | 12033             | 1.19 |
| Oman       | 1723                 | 1.28 | 2547   | 1.45 | 6302        | 1.32 | 2317              | 1.34 |

|                      |       |      |       |      |        |      |       |      |
|----------------------|-------|------|-------|------|--------|------|-------|------|
| Palestine            | 501   | 1.19 | 634   | 1.26 | 2487   | 1.66 | 1423  | 2.3  |
| Qatar                | 3034  | 1.6  | 3866  | 1.66 | 11848  | 1.85 | 4683  | 1.64 |
| Saudi Arabia         | 28312 | 1.75 | 22173 | 1.78 | 74664  | 1.82 | 51948 | 1.76 |
| Somalia              | 6     | 0.87 | 18    | 0.77 | 51     | 1.12 | 10    | 0.73 |
| Sudan                | 556   | 1.19 | 580   | 1.21 | 2317   | 1.13 | 875   | 1.12 |
| Syria                | 426   | 1.01 | 576   | 1.16 | 1342   | 1.23 | 796   | 1.13 |
| Tunisia              | 6393  | 1.1  | 5433  | 1.03 | 29625  | 0.96 | 14002 | 0.92 |
| Turkey               | 30650 | 1.09 | 26424 | 1.48 | 128387 | 1.21 | 70249 | 1.11 |
| United Arab Emirates | 5762  | 1.6  | 9587  | 1.63 | 28459  | 1.57 | 9013  | 1.52 |
| Yemen                | 477   | 1.37 | 379   | 1.56 | 1879   | 1.76 | 1434  | 1.77 |

| Country  | Biochemistry<br>, Genetics<br>and<br>Molecular<br>Biology |      | Dentistry |      | Health<br>Professions |      | Immunology<br>and<br>Microbiology |      | Medicine |      | Neuroscience |      | Nursing |      | Pharmacology,<br>Toxicology<br>and<br>Pharmaceutics |      | Veterinary |      |
|----------|-----------------------------------------------------------|------|-----------|------|-----------------------|------|-----------------------------------|------|----------|------|--------------|------|---------|------|-----------------------------------------------------|------|------------|------|
|          | n                                                         | FWC  | n         | FWC  | n                     | FWC  | n                                 | FWC  | n        | FWC  | n            | FWC  | n       | FWC  | n                                                   | FWC  | n          | FWC  |
| Algeria  | 5152                                                      | 0.95 | 27        | 0.33 | 281                   | 1.2  | 1800                              | 0.95 | 6159     | 2.47 | 328          | 0.99 | 327     | 0.76 | 2529                                                | 0.84 | 805        | 0.97 |
| Bahrain  | 779                                                       | 1.51 | 58        | 1.65 | 95                    | 1.16 | 245                               | 1.37 | 3983     | 3.02 | 138          | 1.89 | 274     | 1.19 | 268                                                 | 1.1  | 24         | 0.97 |
| Comoros  | 21                                                        | 0.89 | -         | -    | 1                     | 0.83 | 34                                | 0.6  | 84       | 1.92 | -            | -    | 4       | 1.73 | 9                                                   | 0.51 | 10         | 0.66 |
| Cyprus   | 3346                                                      | 1.61 | 130       | 1.11 | 747                   | 1.24 | 798                               | 2.07 | 8491     | 2.1  | 851          | 1.38 | 1021    | 1.44 | 869                                                 | 1.07 | 174        | 1.09 |
| Djibouti | 33                                                        | 1.26 | -         | -    | 1                     | -    | 34                                | 1.38 | 134      | 1.14 | 2            | 1.21 | 1       | 0    | 45                                                  | 0.76 | 8          | 5.52 |
| Egypt    | 40706                                                     | 1.25 | 2934      | 1.04 | 2619                  | 0.67 | 12406                             | 1.18 | 79062    | 1.15 | 3987         | 1.12 | 3295    | 1.06 | 23999                                               | 1.4  | 7377       | 1.27 |
| Iran     | 79931                                                     | 1.07 | 6704      | 0.8  | 10007                 | 0.84 | 25922                             | 0.89 | 190369   | 0.89 | 12455        | 0.94 | 12473   | 1.03 | 38643                                               | 1.12 | 9251       | 0.92 |
| Iraq     | 11014                                                     | 0.63 | 637       | 0.6  | 602                   | 1.12 | 2051                              | 0.77 | 14807    | 0.99 | 699          | 0.93 | 441     | 1.26 | 9913                                                | 0.38 | 2228       | 0.7  |
| Israel   | 53600                                                     | 1.52 | 2662      | 1.5  | 4952                  | 1.25 | 14120                             | 1.73 | 115567   | 1.91 | 17732        | 1.35 | 5496    | 1.77 | 8087                                                | 1.38 | 2145       | 1.36 |
| Jordan   | 4842                                                      | 1.17 | 1053      | 1.33 | 909                   | 1.41 | 1212                              | 1.57 | 13257    | 1.9  | 665          | 1.52 | 2220    | 1.49 | 3643                                                | 1.14 | 644        | 1.12 |

|                      |                     |      |                                     |      |                   |      |                                     |      |                   |      |            |      |                 |      |       |      |       |      |
|----------------------|---------------------|------|-------------------------------------|------|-------------------|------|-------------------------------------|------|-------------------|------|------------|------|-----------------|------|-------|------|-------|------|
| Kuwait               | 2259                | 1.48 | 525                                 | 0.89 | 344               | 0.75 | 849                                 | 2.03 | 8381              | 2.2  | 463        | 1.03 | 414             | 1.62 | 1052  | 1.06 | 139   | 2.34 |
| Lebanon              | 4596                | 1.19 | 632                                 | 0.88 | 626               | 1.12 | 1538                                | 1.26 | 18654             | 1.91 | 1021       | 1.21 | 1187            | 1.48 | 1618  | 1.41 | 153   | 1.25 |
| Libya                | 700                 | 1.96 | 175                                 | 1.46 | 44                | 0.44 | 248                                 | 1.06 | 1649              | 4.27 | 46         | 0.87 | 61              | 1.93 | 457   | 1.13 | 182   | 0.78 |
| Mauritania           | 49                  | 1.05 | 1                                   | 0    | 4                 | -    | 78                                  | 0.97 | 309               | 1.2  | 19         | 1.53 | 9               | 0.71 | 11    | 0.53 | 21    | 1.36 |
| Morocco              | 6142                | 1.14 | 417                                 | 0.75 | 582               | 1.4  | 2153                                | 1.18 | 20199             | 1.08 | 860        | 1    | 561             | 0.75 | 2331  | 1.12 | 456   | 1.13 |
| Oman                 | 2349                | 1.44 | 46                                  | 0.32 | 209               | 1.21 | 687                                 | 1.37 | 7287              | 1.74 | 318        | 1.51 | 523             | 2.47 | 1055  | 1.22 | 210   | 0.98 |
| Palestine            | 978                 | 1.38 | 61                                  | 0.91 | 137               | 1.22 | 292                                 | 1.42 | 2971              | 3.09 | 136        | 1.56 | 250             | 1.42 | 684   | 1.05 | 81    | 0.73 |
| Qatar                | 4564                | 1.57 | 237                                 | 1.19 | 1970              | 2.28 | 1169                                | 1.87 | 13861             | 2.17 | 851        | 1.67 | 761             | 1.71 | 1372  | 1.29 | 127   | 1.47 |
| Saudi Arabia         | 39940               | 1.56 | 6046                                | 1.01 | 3540              | 1.37 | 9529                                | 1.27 | 69214             | 1.38 | 4362       | 1.4  | 3762            | 1.4  | 20072 | 1.35 | 2213  | 1.62 |
| Somalia              | 36                  | 0.8  | -                                   | -    | 5                 | 1.21 | 47                                  | 0.85 | 465               | 0.87 | 9          | 0.78 | 35              | 1.43 | 17    | 1.41 | 23    | 0.47 |
| Sudan                | 1873                | 0.91 | 165                                 | 0.56 | 155               | 0.7  | 1254                                | 0.93 | 4817              | 1.2  | 167        | 0.94 | 266             | 1.72 | 870   | 0.94 | 620   | 1.08 |
| Syria                | 1052                | 0.87 | 508                                 | 0.67 | 73                | 0.53 | 291                                 | 0.9  | 2600              | 1.49 | 71         | 0.87 | 84              | 0.95 | 766   | 0.87 | 160   | 0.56 |
| Tunisia              | 10703               | 1    | 252                                 | 0.65 | 1250              | 1.64 | 4214                                | 0.93 | 25384             | 1.25 | 1034       | 1.4  | 647             | 1.17 | 2736  | 0.97 | 799   | 1.24 |
| Turkey               | 64452               | 1.06 | 11221                               | 0.99 | 10774             | 0.95 | 17467                               | 1.07 | 288186            | 0.88 | 15966      | 0.88 | 11520           | 0.97 | 21541 | 1.1  | 13069 | 0.62 |
| United Arab Emirates | 7271                | 1.36 | 1154                                | 1.25 | 997               | 1.78 | 1840                                | 1.44 | 17471             | 1.86 | 1480       | 1.35 | 1115            | 1.66 | 3151  | 1.2  | 591   | 1.23 |
| Yemen                | 790                 | 1.8  | 368                                 | 1.17 | 48                | 1.18 | 308                                 | 0.96 | 1973              | 3.98 | 94         | 1.82 | 68              | 1.29 | 424   | 0.9  | 99    | 2.07 |
| Country              | Arts and Humanities |      | Business, Management and Accounting |      | Decision Sciences |      | Economics, Econometrics and Finance |      | Multidisciplinary |      | Psychology |      | Social Sciences |      |       |      |       |      |
|                      | n                   | FWC  | n                                   | FWC  | n                 | FWC  | n                                   | FWC  | n                 | FWC  | n          | FWC  | n               | FWC  |       |      |       |      |
| Algeria              | 993                 | 0.67 | 1270                                | 0.65 | 2691              | 0.77 | 578                                 | 1.03 | 1095              | 1.18 | 183        | 1.47 | 3396            | 0.78 |       |      |       |      |
| Bahrain              | 228                 | 1.26 | 1219                                | 1.18 | 730               | 0.78 | 584                                 | 1.68 | 160               | 1.05 | 186        | 1.43 | 1413            | 1.16 |       |      |       |      |
| Comoros              | 2                   | -    | 2                                   | 0.4  | 1                 | 0.5  | 1                                   | -    | 8                 | 1.75 | 1          | 0    | 11              | 1.41 |       |      |       |      |
| Cyprus               | 2523                | 1.54 | 2581                                | 1.72 | 1067              | 1.29 | 1763                                | 1.26 | 688               | 2.01 | 1835       | 1.38 | 7604            | 1.42 |       |      |       |      |
| Djibouti             | 6                   | 0    | 3                                   | -    | 3                 | 0.54 | 1                                   | -    | 12                | 2.67 | -          | -    | 30              | 1.24 |       |      |       |      |

|                      |       |      |       |      |       |      |       |      |       |      |       |      |       |      |
|----------------------|-------|------|-------|------|-------|------|-------|------|-------|------|-------|------|-------|------|
| Egypt                | 3002  | 0.36 | 4799  | 0.98 | 3754  | 1.17 | 2561  | 0.94 | 7482  | 1.27 | 1028  | 0.25 | 10927 | 0.57 |
| Iran                 | 11011 | 1.21 | 13183 | 1.34 | 12004 | 1.11 | 6383  | 1.58 | 13753 | 1.03 | 7890  | 1.01 | 34325 | 1.06 |
| Iraq                 | 1324  | 0.64 | 1415  | 0.86 | 2154  | 1.04 | 701   | 0.79 | 1626  | 0.8  | 525   | 0.7  | 5697  | 0.59 |
| Israel               | 27678 | 1.13 | 8449  | 1.14 | 5483  | 0.9  | 6753  | 0.97 | 9009  | 1.93 | 19512 | 1.25 | 49916 | 1.16 |
| Jordan               | 3430  | 0.89 | 3827  | 1.21 | 2362  | 1.72 | 1851  | 1.27 | 1321  | 1.07 | 782   | 1.25 | 8433  | 1.18 |
| Kuwait               | 630   | 0.55 | 1495  | 1.15 | 884   | 0.98 | 802   | 1.34 | 796   | 1.39 | 459   | 0.8  | 2566  | 0.89 |
| Lebanon              | 1498  | 1.38 | 1818  | 1.51 | 862   | 1.08 | 1221  | 2.68 | 643   | 1.34 | 915   | 1.9  | 4341  | 1.19 |
| Libya                | 130   | 0.76 | 304   | 1.28 | 262   | 1    | 128   | 1.41 | 186   | 1.26 | 37    | 1.06 | 485   | 1.38 |
| Mauritania           | 9     | 0    | 12    | 0.48 | 17    | 0.73 | 6     | 0.28 | 21    | 0.92 | 4     | 0.6  | 60    | 0.85 |
| Morocco              | 1141  | 0.88 | 2762  | 0.97 | 3793  | 1    | 1205  | 1.05 | 1056  | 1.7  | 311   | 1.82 | 4405  | 1.07 |
| Oman                 | 786   | 1.19 | 1865  | 1.31 | 925   | 1.46 | 1043  | 1.88 | 535   | 0.92 | 333   | 1.52 | 2971  | 1.48 |
| Palestine            | 424   | 1.25 | 517   | 1.47 | 300   | 1.31 | 257   | 0.86 | 308   | 1.18 | 222   | 1.43 | 1531  | 0.98 |
| Qatar                | 1393  | 1.88 | 1952  | 1.56 | 1353  | 1.7  | 1052  | 1.46 | 1129  | 1.34 | 538   | 1.43 | 4590  | 1.6  |
| Saudi Arabia         | 3681  | 1.08 | 7122  | 1.4  | 5633  | 1.42 | 4295  | 1.58 | 9845  | 1.32 | 2274  | 1.08 | 15445 | 1.29 |
| Somalia              | 26    | 0.35 | 26    | 0.51 | 13    | 0.15 | 27    | 0.43 | 17    | 1.4  | 4     | 0.61 | 141   | 0.52 |
| Sudan                | 190   | 0.73 | 174   | 0.71 | 120   | 1.54 | 178   | 1.05 | 471   | 0.62 | 57    | 0.92 | 955   | 0.98 |
| Syria                | 188   | 0.82 | 171   | 1.02 | 80    | 1.89 | 131   | 1    | 217   | 0.6  | 47    | 1.09 | 608   | 1.15 |
| Tunisia              | 1052  | 0.84 | 4056  | 0.96 | 3287  | 0.84 | 3269  | 1.35 | 992   | 0.89 | 510   | 1.19 | 4393  | 1.12 |
| Turkey               | 19567 | 0.9  | 18414 | 1.14 | 9829  | 1.15 | 14474 | 1.18 | 6282  | 1.04 | 12052 | 1.14 | 63115 | 0.99 |
| United Arab Emirates | 2959  | 1.64 | 8029  | 1.46 | 3866  | 1.58 | 4323  | 1.72 | 1940  | 1.56 | 1478  | 2.03 | 11288 | 1.51 |
| Yemen                | 177   | 1.53 | 382   | 1.59 | 245   | 1.47 | 216   | 1.75 | 301   | 1.35 | 41    | 1.38 | 615   | 1.52 |

*Note. n= Number of scholarly outputs; FWC= Field-weighted citations.*



**Supplementary Table S4.** The number of scholarly outputs in each of the four Scopus's subject areas for each country in the Middle Eastern and Arab region.

| Country      | Physical Sciences | Health Sciences | Social Sciences | Life Sciences | Multidisciplinary |
|--------------|-------------------|-----------------|-----------------|---------------|-------------------|
| Algeria      | 153391            | 7599            | 9111            | 17740         | 1095              |
| Bahrain      | 10507             | 4434            | 4360            | 1892          | 160               |
| Comoros      | 121               | 99              | 18              | 121           | 8                 |
| Cyprus       | 38332             | 10563           | 17373           | 8100          | 688               |
| Djibouti     | 258               | 144             | 43              | 183           | 12                |
| Egypt        | 335097            | 95287           | 26071           | 114599        | 7482              |
| Iran         | 864634            | 228804          | 84796           | 229362        | 13753             |
| Iraq         | 121982            | 18715           | 11816           | 34194         | 1626              |
| Israel       | 301876            | 130822          | 117791          | 118642        | 9009              |
| Jordan       | 61806             | 18083           | 20685           | 14874         | 1321              |
| Kuwait       | 30906             | 9803            | 6836            | 6116          | 796               |
| Lebanon      | 33918             | 21252           | 10655           | 11098         | 643               |
| Libya        | 9740              | 2111            | 1346            | 2247          | 186               |
| Mauritania   | 809               | 344             | 108             | 350           | 21                |
| Morocco      | 118825            | 22215           | 13617           | 18966         | 1056              |
| Oman         | 29744             | 8275            | 7923            | 7261          | 535               |
| Palestine    | 12646             | 3500            | 3251            | 2793          | 308               |
| Qatar        | 49357             | 16956           | 10878           | 9420          | 1129              |
| Saudi Arabia | 408219            | 84775           | 38450           | 98030         | 9845              |
| Somalia      | 231               | 528             | 237             | 168           | 17                |

|                      |        |        |        |        |      |
|----------------------|--------|--------|--------|--------|------|
| Sudan                | 10610  | 6023   | 1674   | 6866   | 471  |
| Syria                | 7704   | 3425   | 1225   | 4385   | 217  |
| Tunisia              | 136022 | 28332  | 16567  | 30459  | 992  |
| Turkey               | 589322 | 334770 | 137451 | 182878 | 6282 |
| United Arab Emirates | 113663 | 21328  | 31943  | 17698  | 1940 |
| Yemen                | 10849  | 2556   | 1676   | 2407   | 301  |

---
